# Supplementary material for: Phytochemical content and antioxidant activity in aqueous extracts of Cyclocarya paliurus leaves collected from different populations
Source: PeerJ. 2019 Feb 19;7:e6492. doi: 10.7717/peerj.6492 (PMC6385679; doi:10.7717/peerj.6492)
Supplement: Supplemental Information 1 [file peerj-07-6492-s001.xlsx]

## Sheet: Fig.2
The content of water-soluble polysaccharide (mg/g)
population	repeat 1	repeat 2	repeat 3	means	SD
S1	66.34	68.84	62.97	66.05	2.94
S2	137.64	144.59	135.46	139.23	4.77
S3	88.83	78.1	94.79	87.24	8.46
S4	89.41	104.66	111.94	102	11.5
S5	77.17	74.7	84.25	78.71	4.96
S6	138.02	144.59	138.08	140.23	3.77
S7	72.94	74.7	73.64	73.76	0.89
S8	129.59	129.11	127.35	128.68	1.18
S9	103.12	106.46	97.96	102.51	4.28
S10	121.32	102.8	128.6	117.58	13.3
S11	121.61	136.93	116.39	124.98	10.68
S12	129.66	121.97	121.2	124.27	4.68
S13	120.07	106.68	129.3	118.69	11.38
S14	121.1	143.4	119.88	128.13	13.24
S15	136.51	135.36	134.94	135.61	0.81
S16	97.42	98.22	108.54	101.39	6.2
S17	100.53	101.1	104.44	102.02	2.11
S18	160.26	151.99	147.7	153.32	6.38
S19	93.51	91.43	91.07	92	1.32
S20	122.54	115.43	110.65	116.21	5.98
S21	74.83	70.57	80.31	75.23	4.88
The content of total flavonoid (mg/g)
population	repeat 1	repeat 2	repeat 3	means	SD
S1	13.34	13.33	13.21	13.29	0.07
S2	19.81	19.74	19.39	19.65	0.23
S3	9.51	8.93	8.99	9.15	0.32
S4	12.4	12.39	12.58	12.46	0.11
S5	12.04	14.7	14.43	13.72	1.46
S6	16.45	16.48	16.38	16.44	0.05
S7	11.98	11.72	11.95	11.88	0.14
S8	10.57	10.33	10.79	10.56	0.23
S9	12.81	12.94	12.89	12.88	0.07
S10	17.01	16.97	16.67	16.88	0.18
S11	19.5	18.97	19.28	19.25	0.27
S12	17.05	17.31	17.06	17.14	0.15
S13	13.89	14.08	13.66	13.88	0.21
S14	13.77	13.48	13.64	13.63	0.14
S15	12.27	12.62	13.53	12.81	0.65
S16	10.71	12.56	12.46	11.91	1.04
S17	12.57	12.7	13.17	12.81	0.31
S18	14.33	14.07	13.94	14.11	0.2
S19	8.3	9.42	9.33	9.01	0.62
S20	15.18	15.1	15.06	15.11	0.06
S21	14.89	14.69	14.53	14.7	0.18
The content of total polyphenol (mg/g)
population	repeat 1	repeat 2	repeat 3	means	SD
S1	28.77	29.55	29.72	29.35	0.5
S2	39.13	39.03	39.32	39.16	0.15
S3	28.52	28.78	29.1	28.8	0.29
S4	32.75	32.91	32.88	32.85	0.08
S5	29.47	29.66	30	29.71	0.27
S6	38.34	39.69	39.18	39.07	0.68
S7	21.45	22.18	22.04	21.89	0.38
S8	32.62	33.33	33.12	33.02	0.36
S9	29.74	29.94	30.15	29.94	0.21
S10	35.78	35.39	35.27	35.48	0.27
S11	49.15	49.74	50.06	49.65	0.46
S12	36.78	36.4	37.28	36.82	0.44
S13	29.65	31.6	31.93	31.06	1.23
S14	53.23	52.32	52.51	52.69	0.48
S15	30.71	31.59	32.05	31.45	0.68
S16	25.61	25.87	24.88	25.45	0.51
S17	20.98	20.87	20.55	20.8	0.22
S18	40.04	39.86	40.08	39.99	0.12
S19	22.3	22.72	22.91	22.64	0.31
S20	36.27	36.59	37.82	36.89	0.82
S21	31.27	32.23	31.65	31.72	0.49

## Sheet: Fig.3
The IC50 of DPPH free radical (mg/ml)
population	IC50	IC50	IC50	means	SD
S1	1.08	1.07	1.07	1.07	0.008
S2	0.39	0.39	0.39	0.39	0.0011
S3	1.03	1.02	1.02	1.02	0.0061
S4	1.28	1.28	1.27	1.28	0.0051
S5	0.74	0.74	0.75	0.74	0.0049
S6	0.51	0.51	0.51	0.51	0.0025
S7	2.37	2.34	2.38	2.36	0.0196
S8	0.68	0.67	0.67	0.67	0.0041
S9	1.49	1.48	1.48	1.48	0.0035
S10	0.68	0.68	0.68	0.68	0.0008
S11	0.43	0.43	0.43	0.43	0.0024
S12	0.72	0.71	0.71	0.72	0.0036
S13	0.82	0.81	0.82	0.82	0.0045
S14	0.37	0.36	0.36	0.36	0.0054
S15	0.81	0.83	0.82	0.82	0.0057
S16	2.24	2.35	2.26	2.29	0.0588
S17	1.55	1.57	1.55	1.56	0.0074
S18	0.51	0.51	0.49	0.51	0.0107
S19	0.81	0.87	0.81	0.83	0.0354
S20	1.38	1.39	1.38	1.39	0.0046
S21	0.56	0.56	0.57	0.56	0.0043
VC	0.03	0.03	0.03	0.03	0.0002
BHT	0.07	0.07	0.08	0.08	0.0033
The IC50 of ABTS free radical (mg/ml)
population	IC50	IC50	IC50	means	SD
S1	0.82	0.9	0.9	0.88	0.0481
S2	0.48	0.51	0.49	0.49	0.0126
S3	0.89	0.87	0.93	0.9	0.0301
S4	0.55	0.52	0.54	0.54	0.0176
S5	1.25	1.19	1.18	1.2	0.0365
S6	0.39	0.4	0.4	0.39	0.006
S7	2.14	2.94	2.66	2.58	0.4049
S8	0.73	0.74	0.7	0.73	0.0222
S9	0.69	0.64	0.71	0.68	0.0387
S10	0.55	0.52	0.56	0.54	0.0188
S11	0.34	0.32	0.3	0.32	0.022
S12	0.52	0.57	0.54	0.54	0.024
S13	0.89	1	0.99	0.96	0.0607
S14	0.56	0.63	0.63	0.61	0.0408
S15	1.99	2.02	2.15	2.05	0.0852
S16	1.2	1.09	1.04	1.11	0.0822
S17	1.88	1.9	1.84	1.87	0.0309
S18	0.48	0.48	0.47	0.48	0.0048
S19	2.81	2.79	2.64	2.75	0.094
S20	0.9	0.9	0.91	0.9	0.0049
S21	0.74	0.73	0.74	0.74	0.0056
VC	0.02	0.02	0.02	0.02	0.0015
BHT	0.48	0.5	0.5	0.49	0.0085
The EC50 of reducing power (mg/ml)
population	EC50	EC50	EC50	means	SD
S1	2.61	2.68	2.56	2.62	0.0604
S2	1.04	1.02	1.03	1.03	0.0137
S3	2.02	1.99	2.03	2.01	0.0238
S4	2.23	2.23	2.22	2.23	0.0072
S5	2.21	2.17	2.19	2.19	0.018
S6	1.23	1.2	1.22	1.22	0.0141
S7	2.54	2.7	2.5	2.58	0.1044
S8	1.78	1.8	1.74	1.77	0.0276
S9	2.53	2.58	2.57	2.56	0.0284
S10	1.92	1.86	1.83	1.87	0.0438
S11	1.59	1.54	1.48	1.54	0.0569
S12	1.75	1.76	1.74	1.75	0.013
S13	1.55	1.54	1.53	1.54	0.0085
S14	1.01	0.97	0.98	0.99	0.0233
S15	2.05	2.04	2.12	2.07	0.042
S16	2.51	2.44	2.38	2.44	0.0622
S17	2.62	2.7	2.67	2.66	0.0366
S18	2.19	2.12	2.1	2.14	0.0462
S19	2.12	2.07	2.11	2.1	0.0273
S20	2.36	2.35	2.36	2.36	0.0066
S21	1.74	1.76	1.78	1.76	0.0204
VC	0.04	0.04	0.04	0.04	0.0005
BHT	0.06	0.06	0.07	0.06	0.0009

## Sheet: Fig.4
population	The IC50 of DPPH free radical (mg/ml)	The IC50 of ABTS free radical (mg/ml)	The EC50 of reducing power (mg/ml)
S1	1.07	0.88	2.62
S2	0.39	0.49	1.03
S3	1.02	0.9	2.01
S4	1.28	0.54	2.23
S5	0.74	1.2	2.19
S6	0.51	0.39	1.22
S7	2.36	2.58	2.58
S8	0.67	0.73	1.77
S9	1.48	0.68	2.56
S10	0.68	0.54	1.87
S11	0.43	0.32	1.54
S12	0.72	0.54	1.75
S13	0.82	0.96	1.54
S14	0.36	0.61	0.99
S15	0.82	2.05	2.07
S16	2.29	1.11	2.44
S17	1.56	1.87	2.66
S18	0.51	0.48	2.14
S19	0.83	2.75	2.1
S20	1.39	0.9	2.36
S21	0.56	0.74	1.76

## Sheet: Fig.5
population	WPS	TFL	TPH	CA1	CA2	Q1
S1	66.05	13.29	29.35	2.51	0	2.48
S2	139.23	19.65	39.16	4.04	2.42	5.66
S3	87.24	9.15	28.8	3.25	1.04	2.84
S4	102	12.46	32.85	3.29	0.88	2.14
S5	78.71	13.72	29.71	3.39	1.09	3.43
S6	140.23	16.44	39.07	4.7	0.96	3.11
S7	73.76	11.88	21.89	3.07	0	3.17
S8	128.68	10.56	33.02	3.86	1.02	2.94
S9	102.51	12.88	29.94	3.41	0.89	2.42
S10	117.58	16.88	35.48	4.75	1.41	3.65
S11	124.98	19.25	49.65	3.58	1.02	4.01
S12	124.27	17.14	36.82	4.33	1.3	3.8
S13	118.69	13.88	31.06	5.6	1.15	3.93
S14	128.13	13.63	52.69	4.53	1.39	5.29
S15	135.61	12.81	31.45	4.06	1.08	2.89
S16	101.39	11.91	25.45	3.36	0.94	2.57
S17	102.02	12.81	20.8	2.99	0.92	2.65
S18	153.32	14.11	39.99	3.82	1.34	4.24
S19	92	9.01	22.64	3.35	0.9	1.61
S20	116.21	15.11	36.89	4.36	1.03	2.7
S21	75.23	14.7	31.72	2.88	0.91	3.1
population	DPPH	ABTS	Reducing power
S1	1.07	0.88	2.62
S2	0.39	0.49	1.03
S3	1.02	0.9	2.01
S4	1.28	0.54	2.23
S5	0.74	1.2	2.19
S6	0.51	0.39	1.22
S7	2.36	2.58	2.58
S8	0.67	0.73	1.77
S9	1.48	0.68	2.56
S10	0.68	0.54	1.87
S11	0.43	0.32	1.54
S12	0.72	0.54	1.75
S13	0.82	0.96	1.54
S14	0.36	0.61	0.99
S15	0.82	2.05	2.07
S16	2.29	1.11	2.44
S17	1.56	1.87	2.66
S18	0.51	0.48	2.14
S19	0.83	2.75	2.1
S20	1.39	0.9	2.36
S21	0.56	0.74	1.76

## Sheet: Table 2 and Table 3
The content of water-soluble polysaccharide (mg/g)							The content of total flavonoid (mg/g)							The content of total polyphenol (mg/g)							The content of 3-O-caffeoyluinic acid (mg/g)						The content of 4-O-caffeoyluinic acid (mg/g)						The content of quercetin-3-O-glucuronide (mg/g)						The content of quercetin-3-O-galactoside (mg/g)						The content of isoquercitrin (mg/g)
population	repeat 1	repeat 2	repeat 3	means	SD		population	repeat 1	repeat 2	repeat 3	means	SD		population	repeat 1	repeat 2	repeat 3	means	SD		population	repeat 1	repeat 2	means	SD		population	repeat 1	repeat 2	means	SD		population	repeat 1	repeat 2	means	SD		population	repeat 1	repeat 2	means	SD		population	repeat 1	repeat 2	means	SD
S1	66.34	68.84	62.97	66.05	2.94		S1	13.34	13.33	13.21	13.29	0.07		S1	28.77	29.55	29.72	29.35	0.5		S1	2.55	2.48	2.51	0.05		S1	0	0	0	0		S1	2.57	2.38	2.48	0.13		S1	0.74	0.71	0.72	0.02		S1	0.04	0.05	0.04	0
S2	137.64	144.59	135.46	139.23	4.77		S2	19.81	19.74	19.39	19.65	0.23		S2	39.13	39.03	39.32	39.16	0.15		S2	3.86	4.22	4.04	0.26		S2	2.29	2.54	2.42	0.18		S2	5.7	5.62	5.66	0.06		S2	1.01	1.01	1.01	0		S2	0.13	0.13	0.13	0
S3	88.83	78.1	94.79	87.24	8.46		S3	9.51	8.93	8.99	9.15	0.32		S3	28.52	28.78	29.1	28.8	0.29		S3	3.2	3.31	3.25	0.07		S3	1.02	1.07	1.04	0.03		S3	2.76	2.92	2.84	0.11		S3	0.53	0.56	0.54	0.02		S3	0	0	0	0
S4	89.41	104.66	111.94	102	11.5		S4	12.4	12.39	12.58	12.46	0.11		S4	32.75	32.91	32.88	32.85	0.08		S4	3.44	3.14	3.29	0.21		S4	0.71	1.05	0.88	0.24		S4	2.15	2.14	2.14	0		S4	0.58	0.62	0.6	0.03		S4	0.11	0.11	0.11	0.01
S5	77.17	74.7	84.25	78.71	4.96		S5	12.04	14.7	14.43	13.72	1.46		S5	29.47	29.66	30	29.71	0.27		S5	3.39	3.39	3.39	0		S5	1.09	1.1	1.09	0		S5	3.4	3.45	3.43	0.03		S5	0.74	0.79	0.76	0.04		S5	0.11	0.12	0.12	0.01
S6	138.02	144.59	138.08	140.23	3.77		S6	16.45	16.48	16.38	16.44	0.05		S6	38.34	39.69	39.18	39.07	0.68		S6	4.91	4.48	4.7	0.3		S6	0.99	0.93	0.96	0.04		S6	3.24	2.98	3.11	0.19		S6	0.87	0.94	0.9	0.06		S6	0.19	0.22	0.2	0.02
S7	72.94	74.7	73.64	73.76	0.89		S7	11.98	11.72	11.95	11.88	0.14		S7	21.45	22.18	22.04	21.89	0.38		S7	3.15	3	3.07	0.1		S7	0	0	0	0		S7	3.26	3.09	3.17	0.12		S7	0.61	0.57	0.59	0.03		S7	0	0	0	0
S8	129.59	129.11	127.35	128.68	1.18		S8	10.57	10.33	10.79	10.56	0.23		S8	32.62	33.33	33.12	33.02	0.36		S8	4	3.72	3.86	0.2		S8	1.03	1.01	1.02	0.02		S8	3.03	2.85	2.94	0.13		S8	0.76	0.71	0.74	0.04		S8	0.11	0.08	0.1	0.02
S9	103.12	106.46	97.96	102.51	4.28		S9	12.81	12.94	12.89	12.88	0.07		S9	29.74	29.94	30.15	29.94	0.21		S9	3.42	3.41	3.41	0.01		S9	0.88	0.89	0.89	0.01		S9	2.39	2.45	2.42	0.04		S9	0.57	0.58	0.58	0		S9	0.05	0.05	0.05	0
S10	121.32	102.8	128.6	117.58	13.3		S10	17.01	16.97	16.67	16.88	0.18		S10	35.78	35.39	35.27	35.48	0.27		S10	4.58	4.91	4.75	0.23		S10	1.36	1.45	1.41	0.06		S10	3.57	3.73	3.65	0.11		S10	0.68	0.73	0.71	0.03		S10	0.08	0.11	0.1	0.02
S11	121.61	136.93	116.39	124.98	10.68		S11	19.5	18.97	19.28	19.25	0.27		S11	49.15	49.74	50.06	49.65	0.46		S11	3.57	3.59	3.58	0.01		S11	1.02	1.02	1.02	0		S11	3.98	4.05	4.01	0.05		S11	0.91	0.94	0.92	0.02		S11	0.12	0.13	0.12	0.01
S12	129.66	121.97	121.2	124.27	4.68		S12	17.05	17.31	17.06	17.14	0.15		S12	36.78	36.4	37.28	36.82	0.44		S12	4.35	4.31	4.33	0.03		S12	1.31	1.29	1.3	0.02		S12	3.87	3.74	3.8	0.09		S12	0.88	0.86	0.87	0.01		S12	0.21	0.18	0.19	0.02
S13	120.07	106.68	129.3	118.69	11.38		S13	13.89	14.08	13.66	13.88	0.21		S13	29.65	31.6	31.93	31.06	1.23		S13	5.66	5.54	5.6	0.08		S13	0.99	1.3	1.15	0.22		S13	3.78	4.07	3.93	0.21		S13	0.53	0.6	0.57	0.06		S13	0.08	0.11	0.09	0.02
S14	121.1	143.4	119.88	128.13	13.24		S14	13.77	13.48	13.64	13.63	0.14		S14	53.23	52.32	52.51	52.69	0.48		S14	4.54	4.51	4.53	0.02		S14	1.39	1.39	1.39	0		S14	5.38	5.2	5.29	0.12		S14	0.84	0.8	0.82	0.03		S14	0.02	0.02	0.02	0
S15	136.51	135.36	134.94	135.61	0.81		S15	12.27	12.62	13.53	12.81	0.65		S15	30.71	31.59	32.05	31.45	0.68		S15	4.11	4	4.06	0.07		S15	1.09	1.06	1.08	0.02		S15	2.94	2.84	2.89	0.07		S15	0.56	0.54	0.55	0.01		S15	0	0	0	0
S16	97.42	98.22	108.54	101.39	6.2		S16	10.71	12.56	12.46	11.91	1.04		S16	25.61	25.87	24.88	25.45	0.51		S16	3.38	3.34	3.36	0.03		S16	0.94	0.94	0.94	0		S16	2.59	2.55	2.57	0.03		S16	0.84	0.82	0.83	0.02		S16	0.13	0.12	0.13	0.01
S17	100.53	101.1	104.44	102.02	2.11		S17	12.57	12.7	13.17	12.81	0.31		S17	20.98	20.87	20.55	20.8	0.22		S17	2.89	3.09	2.99	0.14		S17	0.88	0.96	0.92	0.05		S17	2.48	2.82	2.65	0.24		S17	0.74	0.84	0.79	0.07		S17	0.1	0.14	0.12	0.03
S18	160.26	151.99	147.7	153.32	6.38		S18	14.33	14.07	13.94	14.11	0.2		S18	40.04	39.86	40.08	39.99	0.12		S18	3.88	3.77	3.82	0.07		S18	1.33	1.34	1.34	0.01		S18	4.36	4.12	4.24	0.17		S18	0.7	0.74	0.72	0.02		S18	0.41	0.45	0.43	0.03
S19	93.51	91.43	91.07	92	1.32		S19	8.3	9.42	9.33	9.01	0.62		S19	22.3	22.72	22.91	22.64	0.31		S19	3.34	3.35	3.35	0.01		S19	0.88	0.92	0.9	0.03		S19	1.61	1.62	1.61	0		S19	0.76	0.76	0.76	0		S19	0.09	0.09	0.09	0
S20	122.54	115.43	110.65	116.21	5.98		S20	15.18	15.1	15.06	15.11	0.06		S20	36.27	36.59	37.82	36.89	0.82		S20	4.44	4.27	4.36	0.12		S20	1.18	0.87	1.03	0.21		S20	2.72	2.67	2.7	0.03		S20	0.66	0.65	0.66	0.01		S20	0.34	0.37	0.35	0.02
S21	74.83	70.57	80.31	75.23	4.88		S21	14.89	14.69	14.53	14.7	0.18		S21	31.27	32.23	31.65	31.72	0.49		S21	2.8	2.97	2.88	0.12		S21	0.89	0.94	0.91	0.04		S21	3	3.21	3.1	0.15		S21	0.51	0.52	0.52	0		S21	0.07	0.08	0.07	0
The IC50 of DPPH free radical (mg/ml)							The IC50 of ABTS free radical (mg/ml)							The EC50 of reducing power (mg/ml)
population	IC50	IC50	IC50	means	SD		population	IC50	IC50	IC50	means	SD		population	EC50	EC50	EC50	means	SD
S1	1.08	1.07	1.07	1.07	0.008		S1	0.82	0.9	0.9	0.88	0.0481		S1	2.61	2.68	2.56	2.62	0.0604
S2	0.39	0.39	0.39	0.39	0.0011		S2	0.48	0.51	0.49	0.49	0.0126		S2	1.04	1.02	1.03	1.03	0.0137
S3	1.03	1.02	1.02	1.02	0.0061		S3	0.89	0.87	0.93	0.9	0.0301		S3	2.02	1.99	2.03	2.01	0.0238
S4	1.28	1.28	1.27	1.28	0.0051		S4	0.55	0.52	0.54	0.54	0.0176		S4	2.23	2.23	2.22	2.23	0.0072
S5	0.74	0.74	0.75	0.74	0.0049		S5	1.25	1.19	1.18	1.2	0.0365		S5	2.21	2.17	2.19	2.19	0.018
S6	0.51	0.51	0.51	0.51	0.0025		S6	0.39	0.4	0.4	0.39	0.006		S6	1.23	1.2	1.22	1.22	0.0141
S7	2.37	2.34	2.38	2.36	0.0196		S7	2.14	2.94	2.66	2.58	0.4049		S7	2.54	2.7	2.5	2.58	0.1044
S8	0.68	0.67	0.67	0.67	0.0041		S8	0.73	0.74	0.7	0.73	0.0222		S8	1.78	1.8	1.74	1.77	0.0276
S9	1.49	1.48	1.48	1.48	0.0035		S9	0.69	0.64	0.71	0.68	0.0387		S9	2.53	2.58	2.57	2.56	0.0284
S10	0.68	0.68	0.68	0.68	0.0008		S10	0.55	0.52	0.56	0.54	0.0188		S10	1.92	1.86	1.83	1.87	0.0438
S11	0.43	0.43	0.43	0.43	0.0024		S11	0.34	0.32	0.3	0.32	0.022		S11	1.59	1.54	1.48	1.54	0.0569
S12	0.72	0.71	0.71	0.72	0.0036		S12	0.52	0.57	0.54	0.54	0.024		S12	1.75	1.76	1.74	1.75	0.013
S13	0.82	0.81	0.82	0.82	0.0045		S13	0.89	1	0.99	0.96	0.0607		S13	1.55	1.54	1.53	1.54	0.0085
S14	0.37	0.36	0.36	0.36	0.0054		S14	0.56	0.63	0.63	0.61	0.0408		S14	1.01	0.97	0.98	0.99	0.0233
S15	0.81	0.83	0.82	0.82	0.0057		S15	1.99	2.02	2.15	2.05	0.0852		S15	2.05	2.04	2.12	2.07	0.042
S16	2.24	2.35	2.26	2.29	0.0588		S16	1.2	1.09	1.04	1.11	0.0822		S16	2.51	2.44	2.38	2.44	0.0622
S17	1.55	1.57	1.55	1.56	0.0074		S17	1.88	1.9	1.84	1.87	0.0309		S17	2.62	2.7	2.67	2.66	0.0366
S18	0.51	0.51	0.49	0.51	0.0107		S18	0.48	0.48	0.47	0.48	0.0048		S18	2.19	2.12	2.1	2.14	0.0462
S19	0.81	0.87	0.81	0.83	0.0354		S19	2.81	2.79	2.64	2.75	0.094		S19	2.12	2.07	2.11	2.1	0.0273
S20	1.38	1.39	1.38	1.39	0.0046		S20	0.9	0.9	0.91	0.9	0.0049		S20	2.36	2.35	2.36	2.36	0.0066
S21	0.56	0.56	0.57	0.56	0.0043		S21	0.74	0.73	0.74	0.74	0.0056		S21	1.74	1.76	1.78	1.76	0.0204
VC	0.03	0.03	0.03	0.03	0.0002		VC	0.02	0.02	0.02	0.02	0.0015		VC	0.04	0.04	0.04	0.04	0.0005
BHT	0.07	0.07	0.08	0.08	0.0033		BHT	0.48	0.5	0.5	0.49	0.0085		BHT	0.06	0.06	0.07	0.06	0.0009
population	Longitude (E)	Latitude (N)	Altitude (m)	Annual average precipitation (mm)	Annual sunlight (h)	annual average temperature(◦C)
S1	117.53	30.02	400	1775	1800	13.9
S2	118.89	30.15	753	1726	1926	12.1
S3	116.54	31.02	769	1606	1969	12.3
S4	117.93	25.43	477	1593	1950	18.1
S5	118.76	27.93	932	1998	1738	15.8
S6	106.34	24.46	1478	1364	1906	15.6
S7	104.95	24.61	1773	1212	1475	16.7
S8	109.89	25.62	1307	1629	1544	14.5
S9	110.38	25.92	842	1580	1308	15.5
S10	108.38	26.37	1156	1265	1236	15.1
S11	108.11	27.35	1239	1256	966	13.3
S12	108.51	27.74	1016	1231	1100	14.5
S13	110.42	29.88	1131	1499	1342	11.3
S14	110.9	30.19	969	1377	1533	12.6
S15	110.33	28.88	673	1492	1266	14.8
S16	114.53	27.63	558	1691	1737	15.3
S17	114.89	28.92	825	1655	1600	13.5
S18	103.78	28.97	1153	1332	965	17.3
S19	104.86	32.42	1588	795	900	14.1
S20	105.87	33.36	1218	714	1526	13
S21	119.64	30.41	572	1472	1849	13.4
